# Supplementary material
Source: PubMed Central journal article supplement (PMC2551325)
Supplement: NIHMS63727-supplement-supp_material.pdf [file NIHMS63727-supplement-supp_material.pdf]

# Critical Importance of Length Scale Dependence in Implicit Modeling of Hydrophobic Interactions

Jianhan Chen and Charles L. Brooks III\*

Department of Molecular Biology, The Scripps Research Institute, La Jolla, CA 92037

## Supplementary Materials

I. Complete Reference 16: MacKerell, A. D., Jr. et al., *J. Phys. Chem. B*, **1998**, 102, 3586–3616.

A. D. MacKerell, Jr., D. Bashford, M. Bellott, R. L. Dunbrack, J. D. Evanseck, M. J. Field, S. Fischer, J. Gao, H. Guo, S. Ha, D. Joseph-McCarthy, L. Kuchnir, K. Kuczera, F. T. K. Lau, C. Mattos, S. Michnick, T. Ngo, D. T. Nguyen, B. Prodhom, W. E. Reiher, III, B. Roux, M. Schlenkrich, J. C. Smith, R. Stote, J. Straub, M. Watanabe, J. Wiorkiewicz-Kuczera, D. Yin, and M. Karplus. *J. Phys. Chem. B* **1998**, 102, 3586–3616.

II. Dimer and Trimer Configurations: atomic coordinates can be requested from the authors.

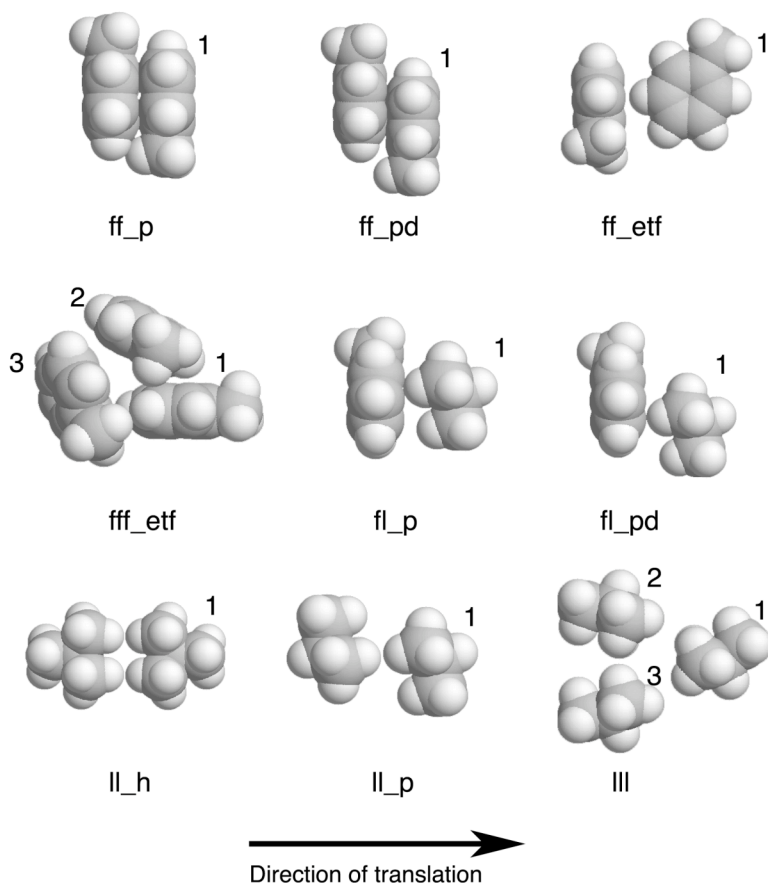

**Figure 1** Configurations of dimeric and trimeric clusters. Monomers marked as “1” were the translated during the PMF calculations. For the two trimeric clusters (fff\_etf and lll), additional pair-wise PMFs were computed between monomers 12 and 13 by deleting either monomer 2 or monomer 3.

III. Production sampling time and Convergence of PMFs: numerical results of the full PMFs are available upon request from the authors.

| Cluster | sampling <sup>1</sup> | convergence <sup>2</sup> |
|---------|-----------------------|--------------------------|
| ff_p    | 2.0                   | 0.1                      |
| ff_pd   | 2.0                   | 0.05                     |
| ff_etf  | 2.0                   | 0.03                     |
| fff_etf | 2.0                   | <0.01                    |
| fff_p12 | 2.0                   | 0.06                     |
| fff_p13 | 2.0                   | 0.04                     |
| fl_p    | 1.0                   | 0.03                     |
| fl_pd   | 1.0                   | 0.05                     |
| ll_h    | 1.0                   | 0.03                     |
| ll_p    | 1.0                   | 0.1                      |
| lll     | 2.0                   | 0.05                     |
| lll_p12 | 2.0                   | <0.01                    |
| lll_p13 | 2.0                   | <0.01                    |

<sup>1</sup> in nanoseconds    <sup>2</sup> in kcal/mol

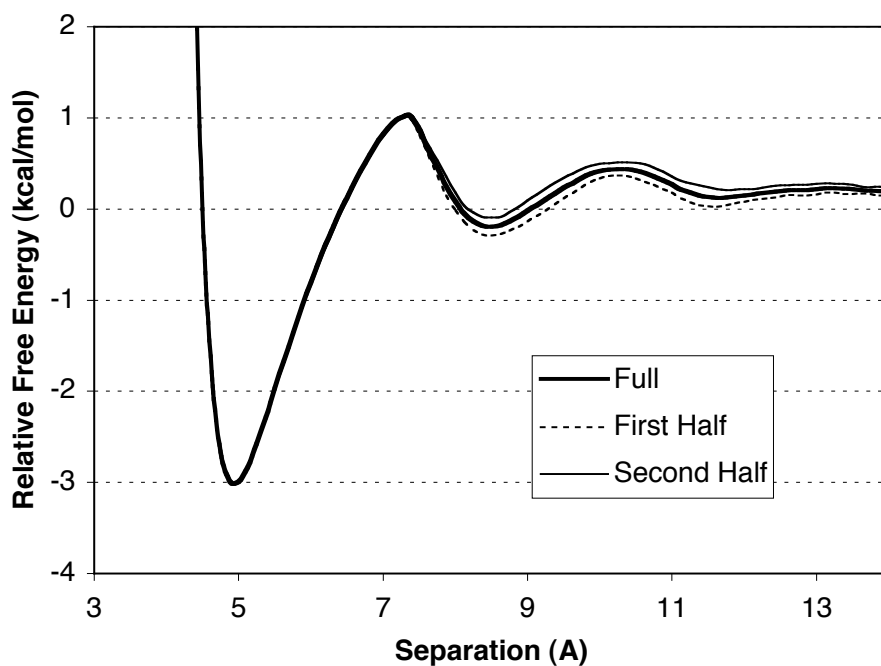

**Figure 2.** PMFs of trimeric Leu sidechain analog association, computed using all 2 ns (thick line), the first 1 ns (dashed line) and the second 1ns (thin line) of sampling.
